# Supplementary material
Source: ML conference proceedings conference paper supplement (https://openreview.net/forum?id=H34Ah8Loqgq)
Supplement: supplementary_material [file attachment]

---

# Appendix: Future Gradient Descent for Adapting the Temporal Shifting Data Distribution in Online Recommendation Systems

---

Mao Ye<sup>1</sup>   Ruichen Jiang<sup>1</sup>   Haoxiang Wang<sup>2</sup>   Dhruv Choudhary<sup>3</sup>   Xiaocong Du<sup>3</sup>   Bhargav Bhushanam<sup>3</sup>  
Aryan Mokhtari<sup>1</sup>   Arun Kejariwal<sup>3</sup>   Qiang Liu<sup>1</sup>

<sup>1</sup>The University of Texas at Austin.

<sup>2</sup>The University of Illinois at Urbana-Champaign.

<sup>3</sup>Meta.

**Extra Notation** We introduce several new notations for the appendix. We use  $\langle \cdot, \cdot \rangle$  to denote the inner product between two vectors and use  $\circ$  to denote the entrywise product.

## 1 PROOF OF THEOREM 1

*Proof.* We start with a simple decomposition using the triangle inequality:

$$\|u_{w,t}(\theta_t)\| \leq \|u_{w,t}(\theta_t) - \bar{m}(\theta_t; t)\| + \|\bar{m}(\theta_t; t)\|.$$

By the termination condition of Algorithm ??, we have  $\|\bar{m}(\theta_t; t)\| \leq \delta$ . Furthermore, it follows from (5) that

$$\|u_{w,t}(\theta_t) - \bar{m}(\theta_t; t)\| = \frac{1}{w} \|\nabla r_t(\theta_t) - m(\theta_t; t)\|.$$

Hence, we obtain

$$\|u_{w,t}(\theta_t)\|^2 \leq \left( \delta + \frac{1}{w} \|\nabla r_t(\theta_t) - m(\theta_t; t)\| \right)^2 \leq 2\delta^2 + \frac{2}{w^2} \|\nabla r_t(\theta_t) - m(\theta_t; t)\|^2. \quad (1)$$

This further implies that

$$\mathfrak{R}_w(T) = \frac{1}{T} \sum_{t=1}^T \|u_{w,t}(\theta_t)\|^2 \leq \frac{2}{w^2 T} \sum_{t=1}^T \|\nabla r_t(\theta_t) - m(\theta_t; t)\|^2 + 2\delta^2, \quad (2)$$

and the main result follows from the fact that  $\|\nabla r_t(\theta_t) - m(\theta_t; t)\|^2 \leq \sup_{\theta} \|\nabla r_t(\theta) - m(\theta; t)\|^2$  for all  $t \in [T]$ . Furthermore, under the boundedness assumption, we have for all  $t \in [T]$

$$\|\nabla r_t(\theta_t) - m(\theta_t; t)\|^2 \leq (\|\nabla r_t(\theta_t)\| + \|m(\theta_t; t)\|)^2 \leq 4M^2. \quad (3)$$

Hence, (??) also implies  $\mathfrak{R}_w(T) \leq 8M^2/w^2 + 2\delta^2$ , which leads to  $\mathfrak{R}_w(T) = O(1/w^2)$  when  $\delta = 1/w$ .  $\square$

## 2 DETAILS OF THE RESULT IN SECTION 4.4

**Algorithm.** Given  $\theta_t$ , define  $h_t(\phi) = \|\nabla r_t(\theta_t) - m(\theta_t; \phi, t)\|^2$  as a function of  $\phi$ , where we view  $\theta_t$  as a constant. Thus, it follows from that (??) that

$$\mathfrak{R}_w(T) \leq \frac{2}{w^2 T} \sum_{t=1}^T h_t(\phi_t) + 2\delta^2. \quad (4)$$

---

**Algorithm 1** Generalized Future Gradient Descent for Smoothed Regret (simplified version for the theoretical study)

---

**Input:** The learning rate  $\eta, \eta_\phi$  for updating the model parameter  $\theta$  and  $\phi$ .  
Initialize  $\phi_1 = [1/b, \dots, 1/b]$ .  
**for**  $t \in [T]$  **do**  
    Deploy the prediction model  $f_{\theta_t}$  with the parameter  $\theta_t$  and collect the new dataset  $D_t$ .  
    Construct the function  $h_t(\phi) = \|\nabla r_t(\theta_t) - m(\theta_t; \phi, t)\|^2$   
     $\phi_{t+1} = \frac{\phi_t \circ \exp(-\eta_\phi \nabla h_t(\phi_t))}{\|\phi_t \circ \exp(-\eta_\phi \nabla h_t(\phi_t))\|_1}$ . ▷ One step of Exponentiated gradient descent from  $\phi_t$   
    Initialize the model parameter  $\theta_{t+1}$ .  
    **while**  $\|\bar{m}(\theta_{t+1}; \phi_{t+1}, t+1)\| \geq \delta$  **do**  
         $\theta_{t+1} = \theta_{t+1} - \eta \bar{m}(\theta_{t+1}; \phi_{t+1}, t+1)$ .  
    **end while**  
**end for**

---

Thus, our goal is to minimize  $\sum_{t=1}^T h_t(\phi_t)$  in an *online* manner, since we can only access  $h_t(\phi_t)$  after  $\phi_t$  is chosen. To achieve this, we use the classic exponentiated gradient method to update  $\phi_t$ . Specifically, for any  $\phi = [a_1, \dots, a_b] \in S_b$ , define the negative potential function  $\psi(\phi) = \sum_{i=1}^b a_i \log a_i$  and its Bregman divergence

$$\mathcal{B}_\psi(\phi; \phi') = \psi(\phi) - \psi(\phi') - \langle \nabla \psi(\phi'), \phi - \phi' \rangle = \sum_{i=1}^b a_i \log \frac{a_i}{a'_i}.$$

Then  $\phi_{t+1}$  is given by

$$\phi_{t+1} = \arg \min_{\phi \in S_b} \left( \langle \nabla h_t, \phi \rangle + \frac{1}{\eta_\phi} \mathcal{B}_\psi(\phi; \phi_t) \right) = \frac{\phi_t \circ \exp(-\eta_\phi \nabla h_t(\phi_t))}{\|\phi_t \circ \exp(-\eta_\phi \nabla h_t(\phi_t))\|_1},$$

where  $\eta_\phi$  is the learning rate. See Section 6.6 in ? for the derivation of the last equality. Intuitively,  $\frac{1}{\eta_\phi} \mathcal{B}_\psi(\phi; \phi_t)$  stabilizes the algorithm by ensuring that  $\phi_{t+1}$  remains close to  $\phi_t$ .

This simplified version of FGD is summarized in Algorithm ?? . Note that when updating  $\phi$ , we only use the last recommendation model  $\theta_t$ .

**Lemma 1.** Suppose that we have  $\|\nabla r_t(\theta)\| \leq M$  for all  $\theta \in \Theta$  and  $t$ . Then  $\|\nabla h_t(\phi)\|_\infty \leq 8M^2$  for all  $\phi \in S_b$ .

*Proof.* By definition, we have

$$h_t(\phi) = \|\nabla r_t(\theta_t) - \sum_{i=1}^b a_i \nabla r_{t-i}(\theta_t)\|^2 = \left\| \sum_{i=1}^b a_i (\nabla r_t(\theta_t) - \nabla r_{t-i}(\theta_t)) \right\|^2,$$

where we used the fact that  $\sum_{i=1}^b a_i = 1$ . Direct computation shows that

$$\left| \frac{\partial h_t}{\partial a_i}(\phi) \right| = 2 \left| \left\langle \nabla r_t(\theta_t) - \nabla r_{t-i}(\theta_t), \sum_{j=1}^b a_j (\nabla r_t(\theta_t) - \nabla r_{t-j}(\theta_t)) \right\rangle \right| \quad (5)$$

$$\leq 2 \|\nabla r_t(\theta_t) - \nabla r_{t-i}(\theta_t)\| \left\| \sum_{j=1}^b a_j (\nabla r_t(\theta_t) - \nabla r_{t-j}(\theta_t)) \right\| \quad (6)$$

$$\leq 2(\|\nabla r_t(\theta_t)\| + \|\nabla r_{t-i}(\theta_t)\|) \left( \sum_{j=1}^b a_j (\|\nabla r_t(\theta_t)\| + \|\nabla r_{t-j}(\theta_t)\|) \right) \quad (7)$$

$$\leq 8M^2, \quad (8)$$

where we used Cauchy-Schwarz inequality in (??), the triangle inequality in (??) and the boundedness of the gradients in (??). Hence, we conclude that  $\|\nabla h_t(\phi)\|_\infty \leq 8M^2$ .  $\square$

**Proof of Theorem 2.** Now we proceed to the proof of Theorem 2. This is a standard result in the online learning literature (see, e.g., ?). For completeness, we present the proof below.

*Proof.* As  $\psi$  is  $\lambda$ -strongly convex with  $\lambda = 1$ , we have

$$\mathcal{B}_\psi(\phi; \phi') \geq \frac{1}{2} \|\phi - \phi'\|_1^2. \quad (9)$$

Throughout the proof, we slightly abuse the notation by writing  $\eta_\phi = \eta$  and  $\nabla h_t = \nabla h_t(\phi_t)$  for simplicity. Notice that by our update rule  $\phi_{t+1}$  is given by

$$\phi_{t+1} = \arg \min_{\phi \in S_b} (\eta \langle \nabla h_t, \phi \rangle + \mathcal{B}_\psi(\phi; \phi_t)).$$

From the first-order optimality condition, we get for any  $\phi \in S_b$ ,

$$\begin{aligned} & \langle \eta \nabla h_t + \nabla \psi(\phi_{t+1}) - \nabla \psi(\phi_t), \phi_{t+1} - \phi \rangle \leq 0 \\ \Leftrightarrow & \quad \eta \langle \nabla h_t, \phi_t - \phi \rangle \leq \eta \langle \nabla h_t, \phi_t - \phi_{t+1} \rangle + \langle \nabla \psi(\phi_{t+1}) - \nabla \psi(\phi_t), \phi - \phi_{t+1} \rangle \\ \Leftrightarrow & \quad \eta \langle \nabla h_t, \phi_t - \phi \rangle \leq \eta \langle \nabla h_t, \phi_t - \phi_{t+1} \rangle - \mathcal{B}_\psi(\phi; \phi_{t+1}) + \mathcal{B}_\psi(\phi; \phi_t) - \mathcal{B}_\psi(\phi_{t+1}; \phi_t), \end{aligned}$$

where we used the three-point equality (?) in the last inequality. Furthermore,

$$\begin{aligned} \eta \langle \nabla h_t, \phi_t - \phi_{t+1} \rangle - \mathcal{B}_\psi(\phi; \phi_{t+1}) & \leq \eta \|\nabla h_t\|_\infty \|\phi_t - \phi_{t+1}\|_1 - \frac{1}{2} \|\phi_t - \phi_{t+1}\|_1^2 \\ & \leq \frac{\eta^2}{2} \|\nabla h_t\|_\infty^2 + \frac{1}{2} \|\phi_t - \phi_{t+1}\|_1^2 - \frac{1}{2} \|\phi_t - \phi_{t+1}\|_1^2 \\ & = \frac{\eta^2}{2} \|\nabla h_t\|_\infty^2. \end{aligned}$$

Combining these two bounds, we have

$$\eta \langle \nabla h_t, \phi_t - \phi \rangle \leq \mathcal{B}_\psi(\phi; \phi_t) - \mathcal{B}_\psi(\phi; \phi_{t+1}) + \frac{\eta^2}{2} \|\nabla h_t\|_\infty^2.$$

Since  $h_t(\phi)$  is convex in  $\phi$ , we have  $h_t(\phi_t) - h_t(\phi) \leq \langle \nabla h_t, \phi_t - \phi \rangle$  for any  $\phi \in S_b$ . By telescoping, we obtain

$$\begin{aligned} \sum_{t=1}^T (h_t(\phi_t) - h_t(\phi)) & \leq \sum_{t=1}^T \langle \nabla h_t, \phi_t - \phi \rangle \\ & \leq \frac{1}{\eta} \sum_{t=1}^T \left[ \mathcal{B}_\psi(\phi; \phi_t) - \mathcal{B}_\psi(\phi; \phi_{t+1}) + \frac{\eta^2}{2} \|\nabla h_t\|_\infty^2 \right] \\ & = \frac{1}{\eta} (\mathcal{B}_\psi(\phi; \phi_1) - \mathcal{B}_\psi(\phi; \phi_{T+1})) + \frac{\eta}{2} \sum_{t=1}^T \|\nabla h_t\|_\infty^2 \\ & \leq \frac{1}{\eta} \log b + 32\eta M^4 T. \end{aligned}$$

where we used Lemma ??,  $\mathcal{B}_\psi(\phi; \phi_{T+1}) \geq 0$  and  $\mathcal{B}_\psi(\phi; \phi_1) = \psi(\phi) + \log b \leq \log b$  in the last inequality. Choosing  $\eta = c\sqrt{(\log b)/(TM^4)}$  with some constant  $c > 0$  leads to

$$\sum_{t=1}^T [h_t(\phi_t) - h_t(\phi)] \leq O(M^2 \sqrt{T \log b}). \quad (10)$$

---

**Algorithm 2** Generalized Future Gradient Descent for Smoothed Loss

---

**Input:** The learning rate  $\eta$ ,  $\eta_\phi$  for updating the model parameter  $\theta$  and  $\phi$ . The initial trajectory buffer  $B$ .

**for**  $t \in [T]$  **do**

    Deploy the prediction model  $f_{\theta_t}$  with parameter  $\theta_t$ . Then collect the new dataset  $D_t$ .

    Initialize the parameter of MFGG  $\phi_{t+1}$ . ▷ Initialization of  $\phi_{t+1}$  is user-specific.

**for** Inner loop iteration  $k \in K$  **do** ▷ Update the meta network.

$\phi_{t+1} \leftarrow \phi_{t+1} - \eta_\phi \sum_{\theta \in B} \nabla_\phi \|m(\theta; \phi_{t+1}, t) - \nabla r_t(\theta)\|^2$ . ▷ May replace with the mini-batch version.

**end for**

    Initialize the trajectory buffer  $B = \emptyset$  and model parameter  $\theta_{t+1}$ . ▷ Initialization scheme of  $\theta_{t+1}$  is specified by user.

**while**  $\|\bar{m}(\theta_{t+1}; \phi_{t+1}, t+1)\| \geq \delta$  **do** ▷ Alternatively, we may run gradient descent with a fixed number of iterations.

$\theta_{t+1} \leftarrow \theta_{t+1} - \eta m(\theta_{t+1}; \phi_{t+1}, t+1)$ . ▷ May replace with the mini-batch version.

$B \leftarrow B \cup \{\theta_{t+1}\}$  ▷ Alternatively, we may update the trajectory buffer  $B$  every a few iterations.

**end while**

**end for**

---

Note that (??) holds for any  $\phi \in S_b$ . In particular, we can set  $\phi = \phi^*$  defined by  $\phi^* = \arg \min_{\phi \in S_b} \sum_{t=1}^T h_t(\phi)$ . Therefore,

$$\begin{aligned} \sum_{t=1}^T h_t(\phi_t) &\leq \sum_{t=1}^T h_t(\phi^*) + O(M^2 \sqrt{T \log b}) \\ &= \min_{\phi \in S_b} \sum_{t=1}^T \|\nabla r_t(\theta_t) - m(\theta_t; \phi, t)\|^2 + O(M^2 \sqrt{T \log b}) \\ &\leq \min_{\phi \in S_b} \sum_{t=1}^T \sup_{\theta} \|\nabla r_t(\theta) - m(\theta; \phi, t)\|^2 + O(M^2 \sqrt{T \log b}) = \min_{m \in \mathcal{M}} Q[T; m] + O(M^2 \sqrt{T \log b}). \end{aligned}$$

We thus conclude from (??) that

$$\mathfrak{R}_w(T) \leq \frac{2}{w^2 T} (\min_{m \in \mathcal{M}} Q[T; m] + O(M^2 \sqrt{T \log b})) + 2\delta^2.$$

□

### 3 A PRACTICAL GENERALIZED FGD ALGORITHM.

Compared with FGD in Algorithm 2, we use a smoothed version of MFGG  $\bar{m}$  for training, which is due to the consideration of minimizing a smoothed loss in (2). For completeness, we also summarize the practical algorithm of the generalized version of FGD in Algorithm ??.

#### References

- Gong Chen and Marc Teboulle. Convergence analysis of a proximal-like minimization algorithm using bregman functions. *SIAM Journal on Optimization*, 1993.
- Francesco Orabona. A modern introduction to online learning. *arXiv:1912.13213*, 2019.
