# Supplementary material
Source: ML conference proceedings conference paper supplement (https://openreview.net/forum?id=H34Ah8Loqgq)

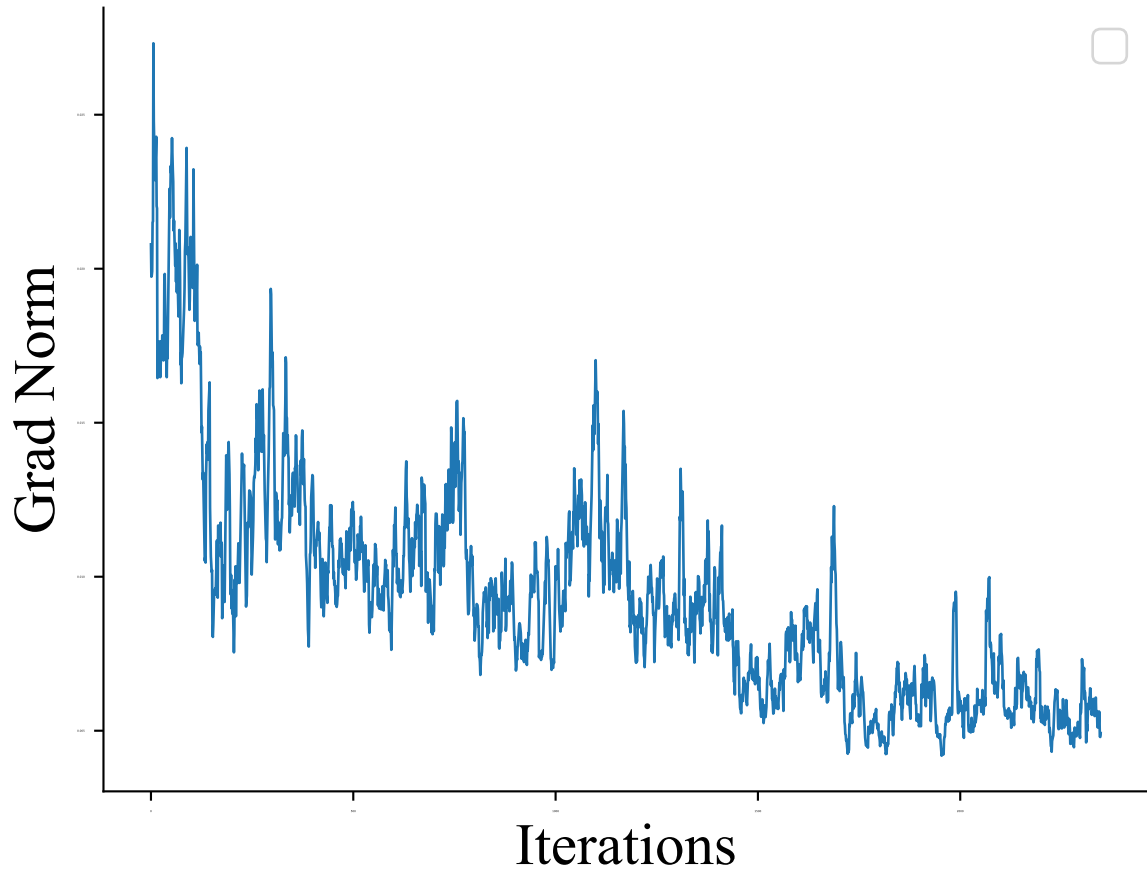

Supplement: supplementary_material [file attachment]

Forecast Error of MFGG

Iterations

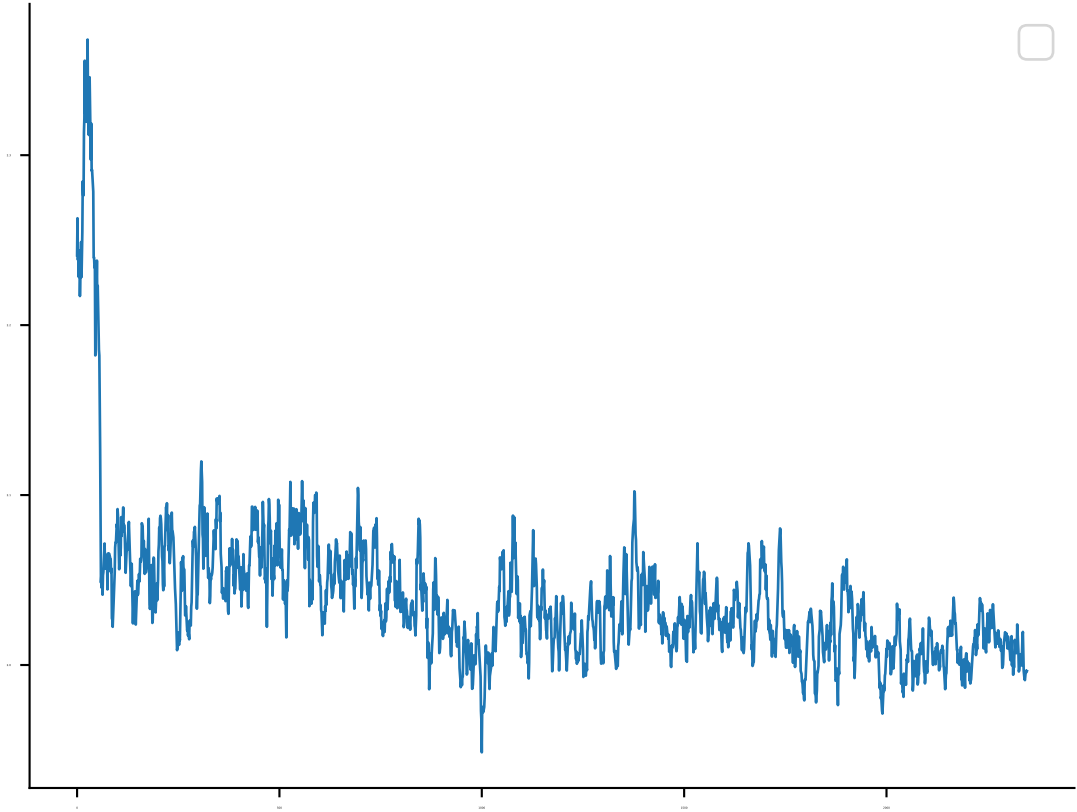

Supplement: supplementary_material [file attachment]

(1) Ideal Update:  
use future info

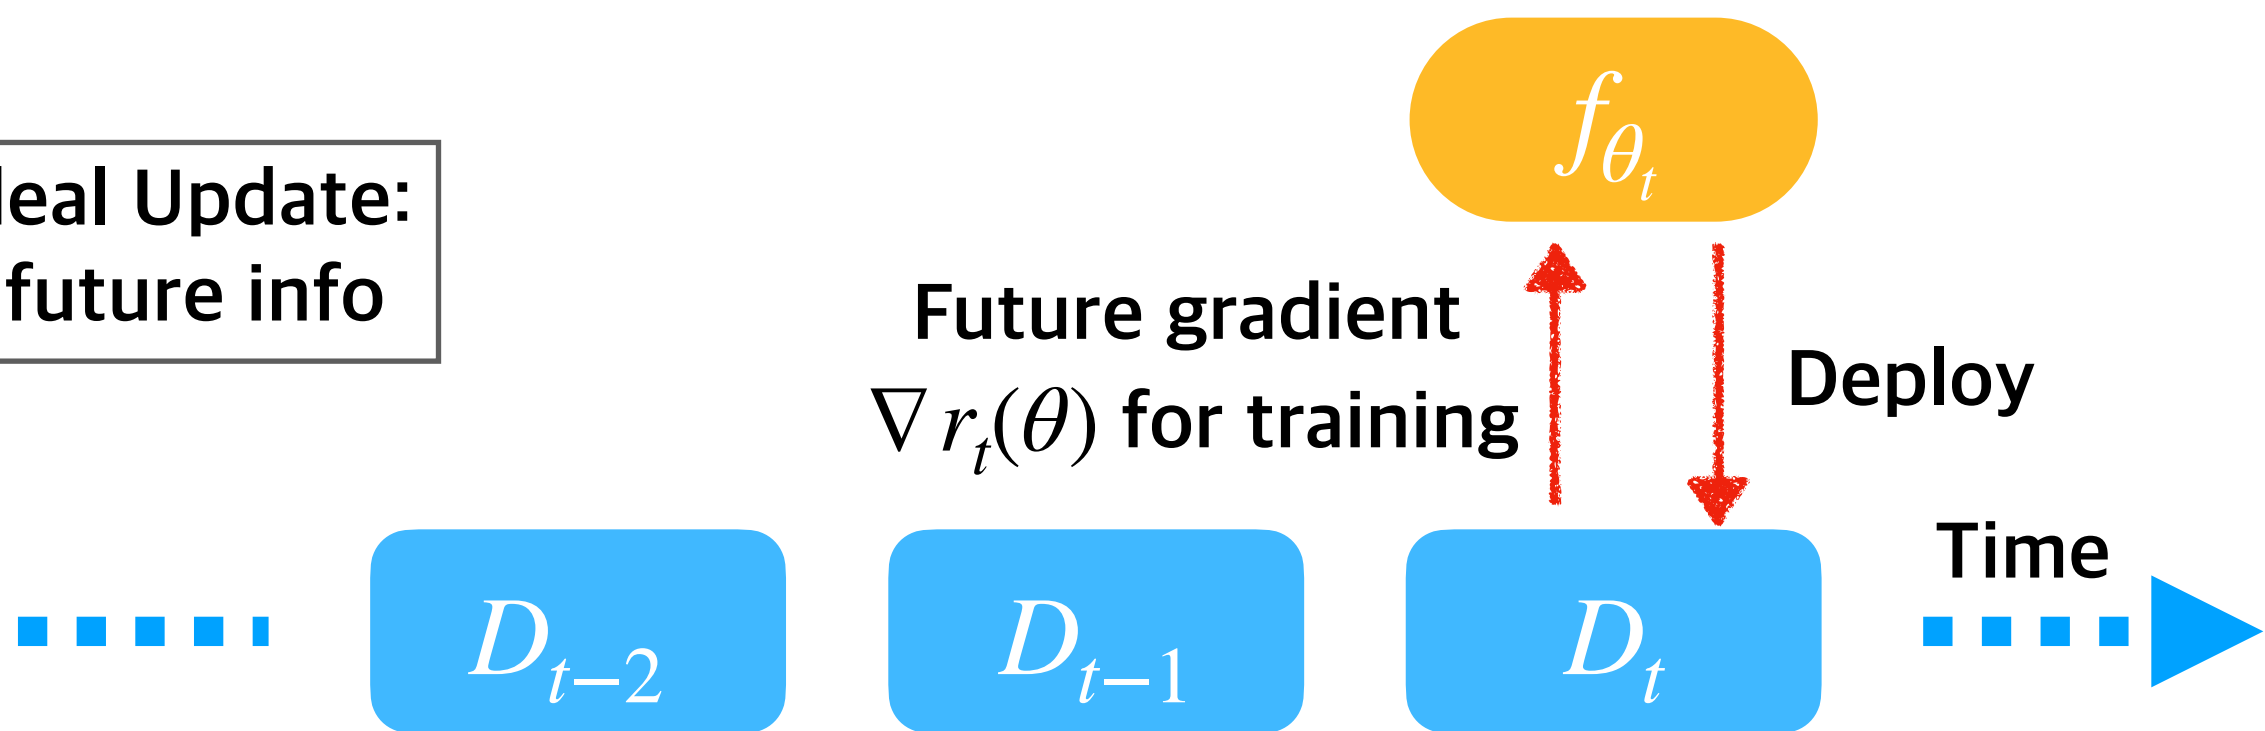

(2) Batch Update:  
simple averaging

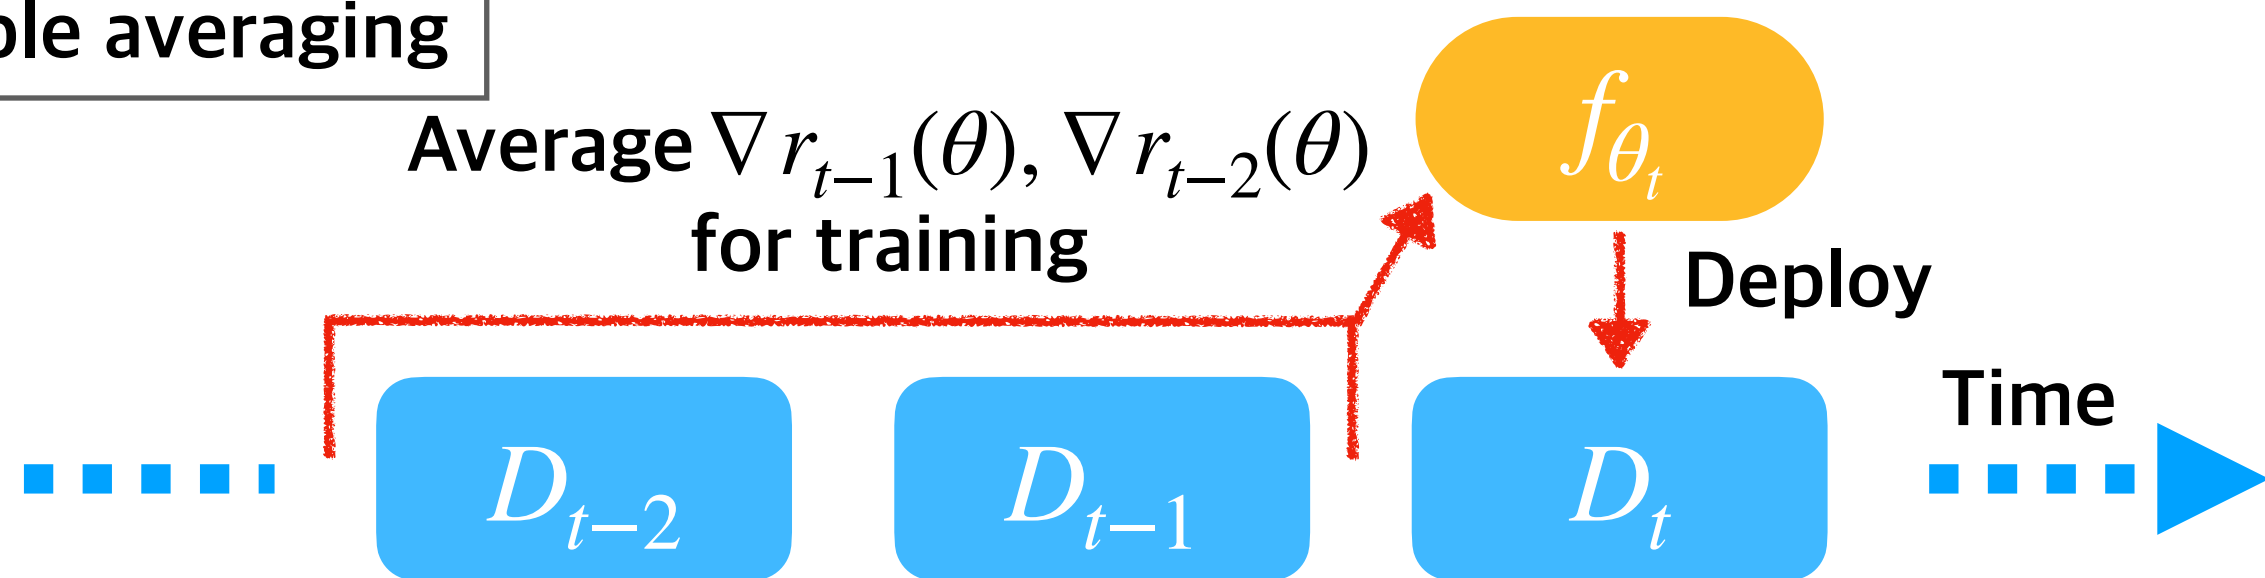

(3) FGD Update:  
forecast future info

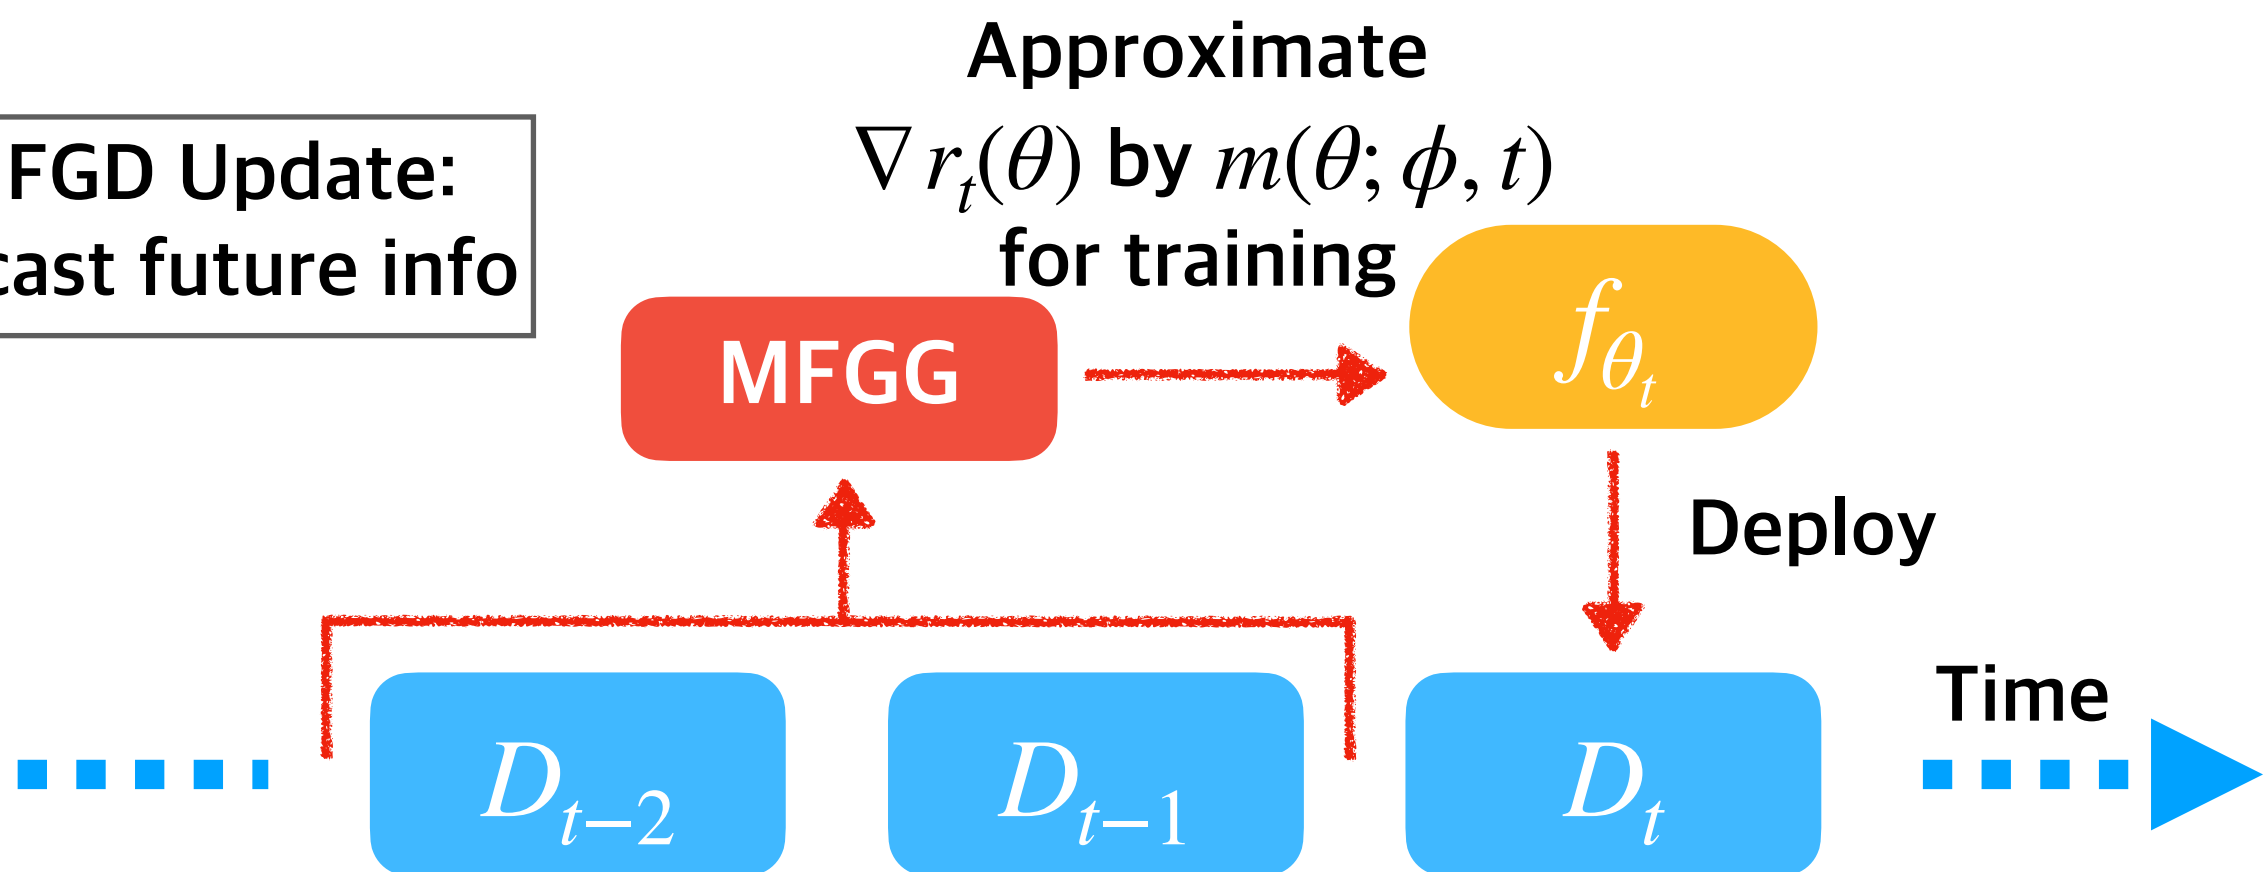

Supplement: supplementary_material [file attachment]

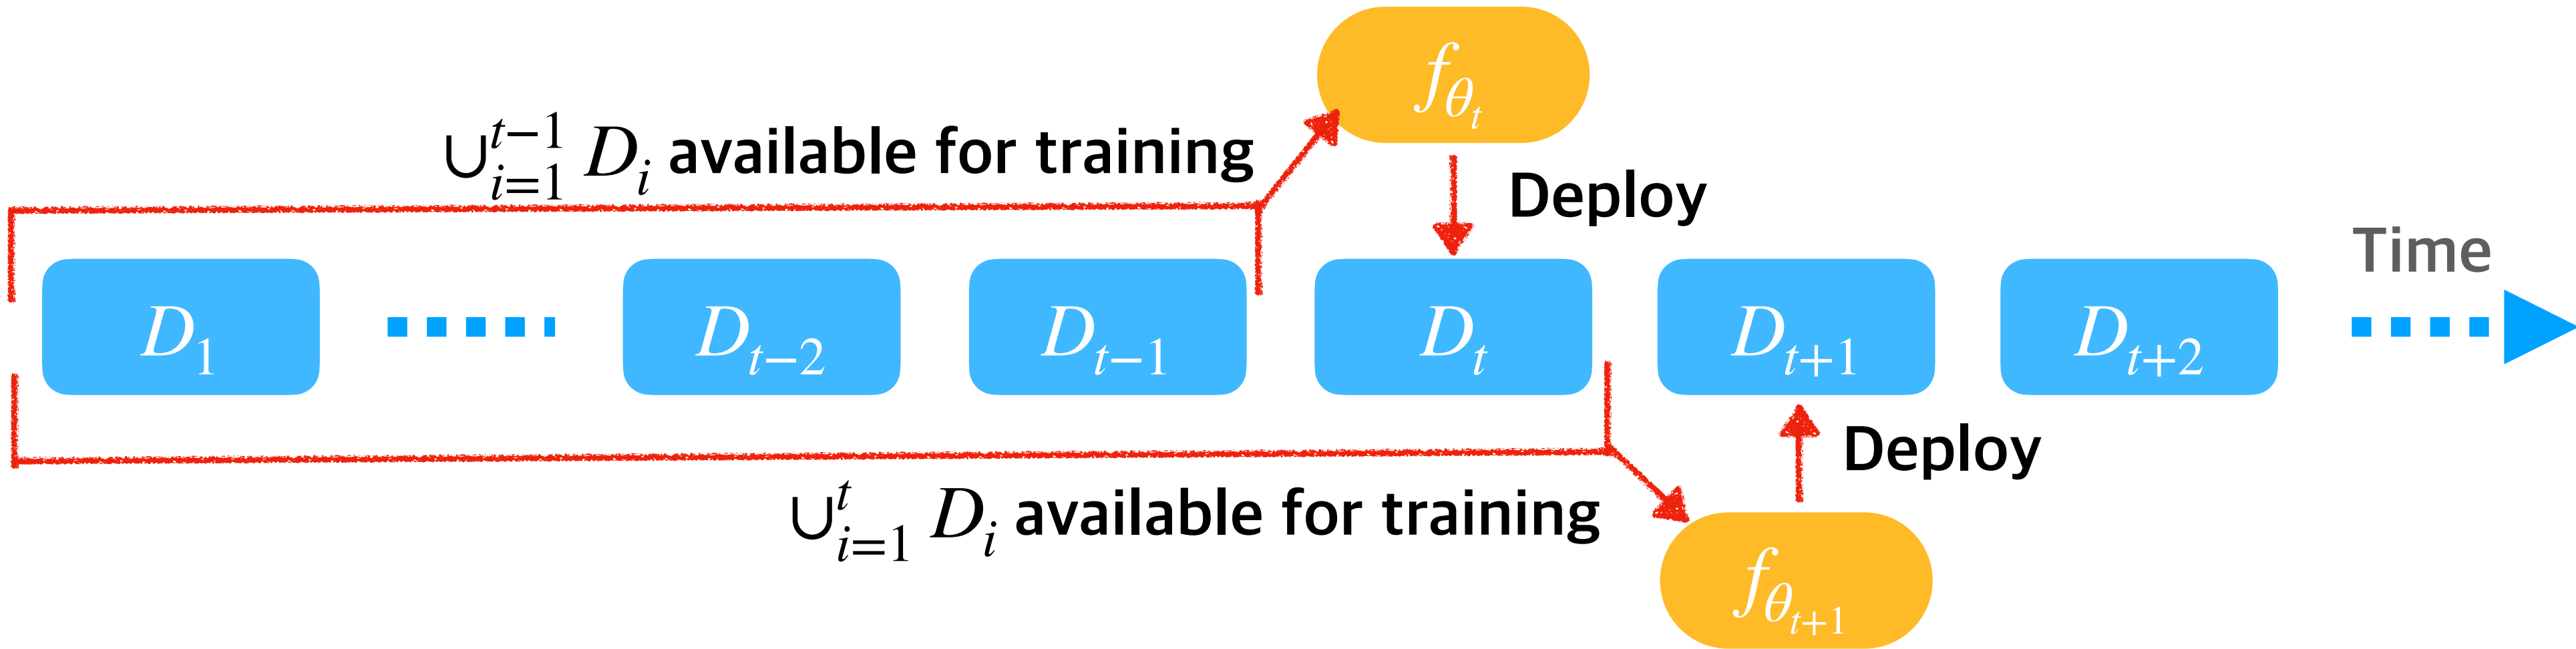

Supplement: supplementary_material [file attachment]

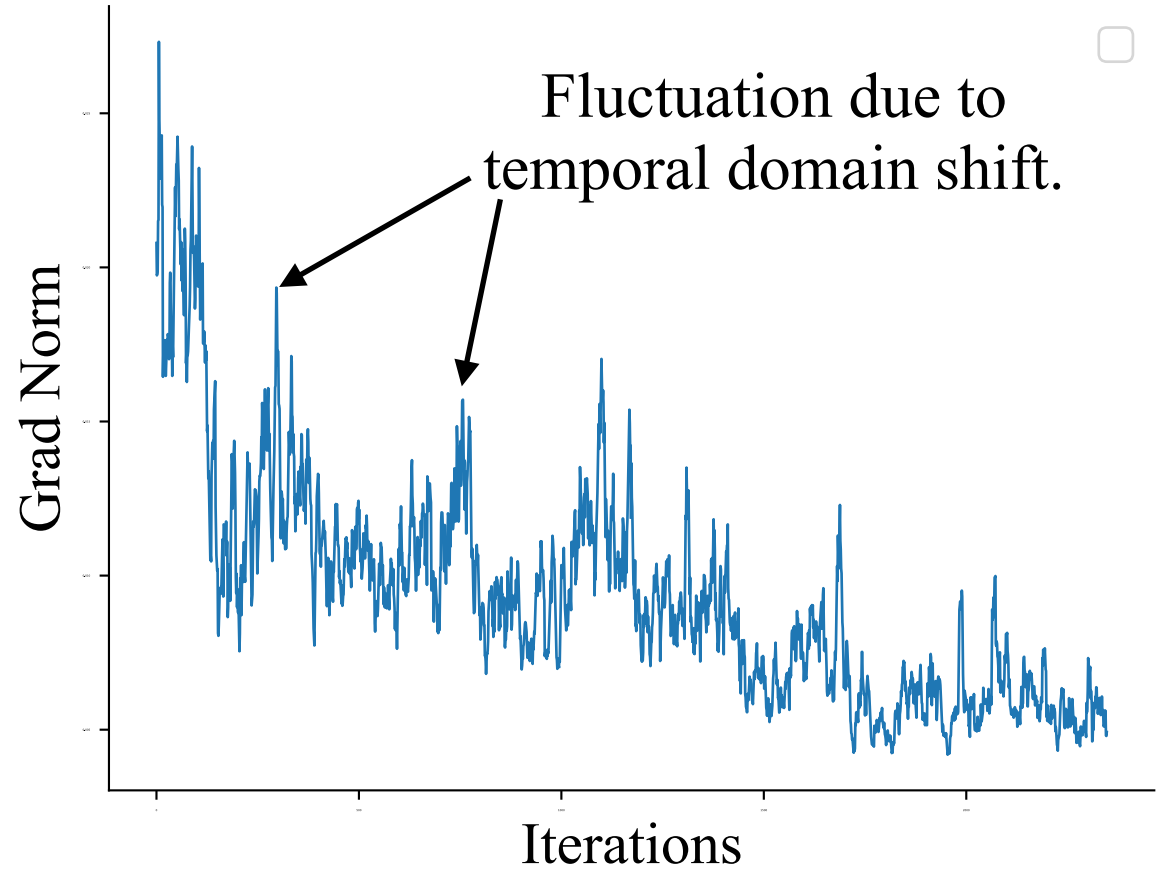

Supplement: supplementary_material [file attachment]
